# Supplementary material for: Different Strategies for the Preparation of Galactose-Functionalized Thermo-Responsive Nanogels with Potential as Smart Drug Delivery Systems
Source: Polymers (Basel). 2020 Sep 21;12(9):2150. doi: 10.3390/polym12092150 (PMC7569999; doi:10.3390/polym12092150)
Supplement: Supplementary file 1 [file polymers-12-02150-s001.pdf]

## Supplementary Materials

# Different Strategies for the Preparation of Galactose-Functionalized Thermo-Responsive Nanogels with Potential as Smart Drug Delivery Systems

Mirian A. González-Ayón<sup>1</sup>, Angel Licea-Claverie<sup>1\*</sup> and J. Adriana Sañudo-Barajas<sup>2</sup>

<sup>1</sup>Centro de Graduados e Investigación en Química, Tecnológico Nacional de México/Instituto Tecnológico de Tijuana, Apartado Postal 1166, Tijuana, B.C., C.P. 22454, México.

<sup>2</sup>Centro de Investigación en Alimentación y Desarrollo, A. C. Carretera a El dorado Km 5.5, Culiacán, Sinaloa, C.P. 80110, México.

\*Corresponding author: E-mail: [aliceac@tectijuana.mx](mailto:aliceac@tectijuana.mx).

## Experimental Section

### Synthesis of 2-lactobionamidoethyl methacrylate (LAMA)

The formation of the LAMA monomer was verified by signal comparison of LAMA with lactobionic acid by FT-IR. In the lactobionic acid a signal at 3328 cm<sup>-1</sup> corresponding to O-H stretching vibration is observed, a signal of -CH<sub>2</sub>- is present at 2906 cm<sup>-1</sup>, the C=O stretching band appears at 1736 cm<sup>-1</sup> for the acid and at 1030 cm<sup>-1</sup> the -C-O- band from the aliphatic chain, is observed. The FT-IR spectrum of the LAMA monomer shows that the C=O band is displaced to 1708 cm<sup>-1</sup>, which corresponds to an ester carbonyl, the signal =CH<sub>2</sub> appears at 1644 cm<sup>-1</sup> and the -NH bending at 1538 cm<sup>-1</sup> (**Figure S1**), thus confirming the success of the LAMA monomer synthesis. By <sup>1</sup>H-NMR (**Figure S2**), the formation and purity of LAMA was confirmed. In further detail, the signal corresponding to -NH at 7.76 ppm integrates for one hydrogen, at 6.05 and 5.66 ppm, the hydrogens of the vinyl group are shown, the signals of methines *i* and *l* attached to the oxygen that unites the galactose ring to the monomer, appear at 5.18 and 5.10 ppm (both integrate for one hydrogen), methylene *d* attached to the ester of methacrylate is observed at 4.72 ppm with an integration of 2, while methine *g* in the lactobionic acid residue is observed at 4.57 ppm integrating for one hydrogen, the signals of the hydrogens marked as *e*, *h-k*, *m-r* that correspond to the majority of the lactobionic acid skeleton hydrogens, are observed between 4.38 and 3.3 ppm; and a signal of methyl *c* (of methacrylate) is observed as a triplet at 1.85 ppm, integrating for 3 hydrogens.

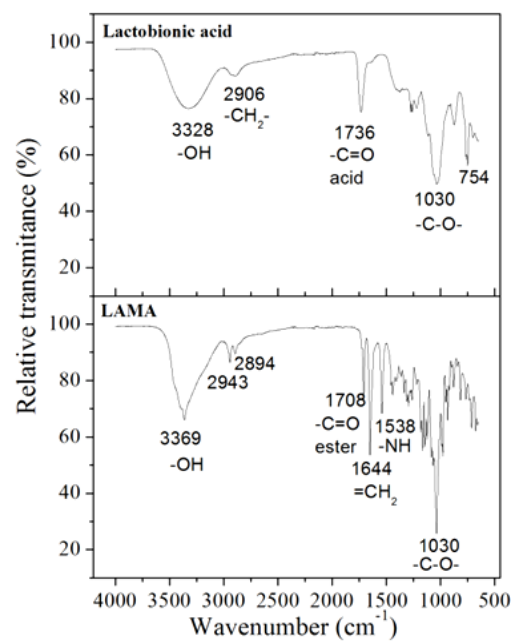

**Figure S1.** FT-IR spectra of lactobionic acid and LAMA monomer.

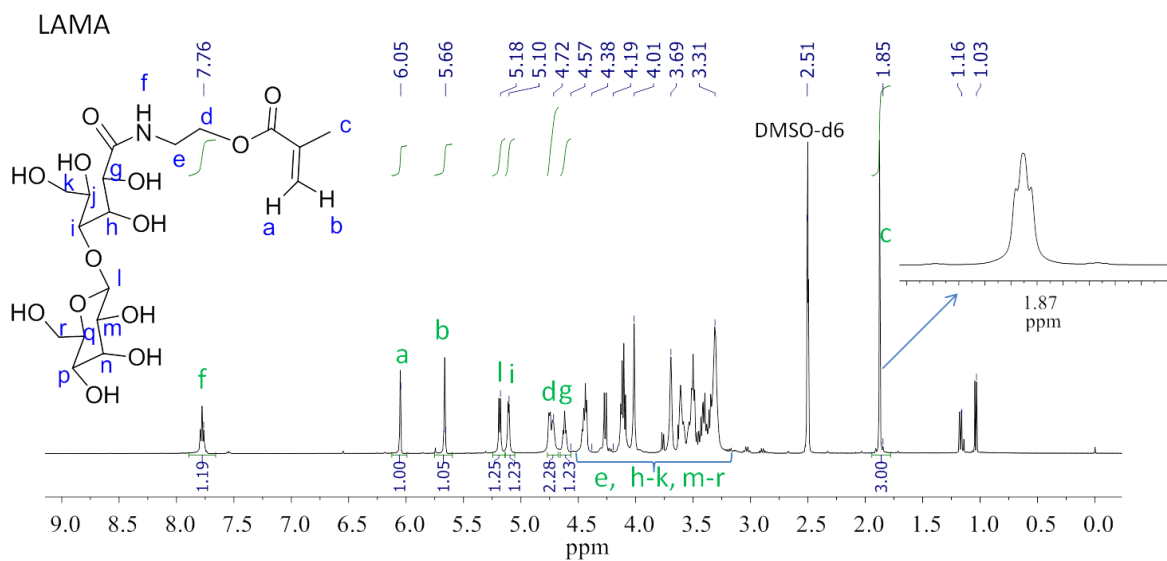

**Figure S2.**  $^1\text{H}$ -NMR spectrum of LAMA monomer.

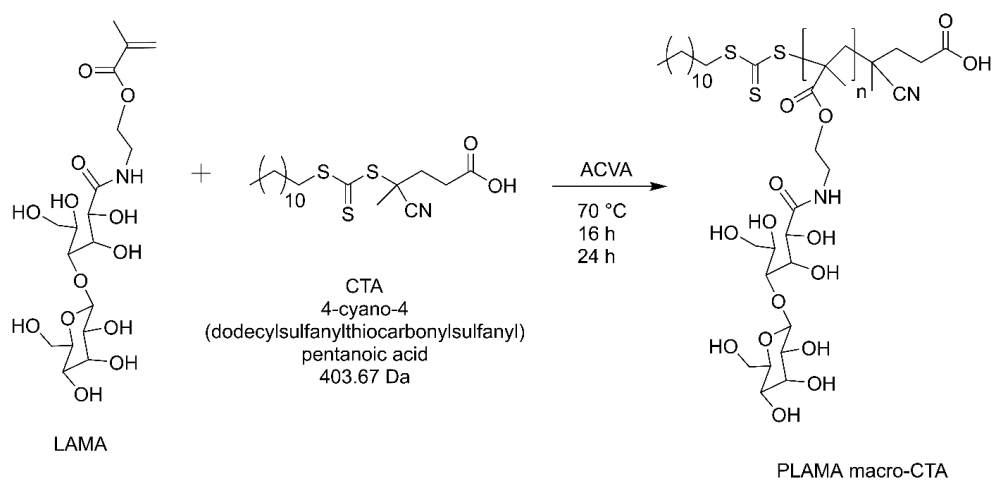

**Scheme S1.** Synthesis of PLAMA macro-CTA.

**Table S1.** Reaction conditions for the preparation of nanogels PNVCL:PEGMA:GAL using 3 mol% of EGDMA with respect to NVCL as crosslinker by SFEP (free radical and RAFT).

| Nanogel                | NVCL:PEGMA:GAL<br>(wt%) | NVCL<br>(g)   | PEGMA<br>(g) | GAL<br>(g)          | Initiator<br>(g)    | Yield<br>(%) <sup>f</sup> |
|------------------------|-------------------------|---------------|--------------|---------------------|---------------------|---------------------------|
| <b>Nanogels I</b>      |                         | 1 h at 85 °C  |              |                     |                     |                           |
| N46 <sub>(6-ABG)</sub> | 37.5:25:37.5            | 0.3           | 0.2          | 0.30 <sup>a)</sup>  | 0.075 <sup>d)</sup> | 52                        |
| N45 <sub>(6-ABG)</sub> | 46:31:23                | 0.3           | 0.2          | 0.15 <sup>a)</sup>  | 0.038 <sup>d)</sup> | 55                        |
| N48 <sub>(6-ABG)</sub> | 52:35:13                | 0.3           | 0.2          | 0.075 <sup>a)</sup> | 0.019 <sup>d)</sup> | 52                        |
| <b>Nanogels II</b>     |                         | 1 h at 85 °C  |              |                     |                     |                           |
| N32                    | 60:40:00                | 0.3           | 0.2          | -                   | 0.024 <sup>d)</sup> | 53                        |
| N50 <sub>(LAMA)</sub>  | 46:31:23                | 0.3           | 0.2          | 0.15 <sup>b)</sup>  | 0.038 <sup>d)</sup> | 54                        |
| N51 <sub>(LAMA)</sub>  | 52:35:13                | 0.3           | 0.2          | 0.075 <sup>b)</sup> | 0.038 <sup>d)</sup> | 53                        |
| <b>Nanogels III</b>    |                         | 24 h at 70 °C |              |                     |                     |                           |
| N42                    | 46:31:23                | 0.3           | 0.2          | 0.15 <sup>c)</sup>  | 0.038 <sup>e)</sup> | 51                        |
| N44                    | 51:34:15                | 0.3           | 0.2          | 0.09 <sup>c)</sup>  | 0.023 <sup>e)</sup> | 53                        |

<sup>a)</sup>6-ABG; <sup>b)</sup>LAMA; <sup>c)</sup>PLAMA macro-CTA; <sup>d)</sup>KPS; <sup>e)</sup>ACVA; <sup>f)</sup>mass yield

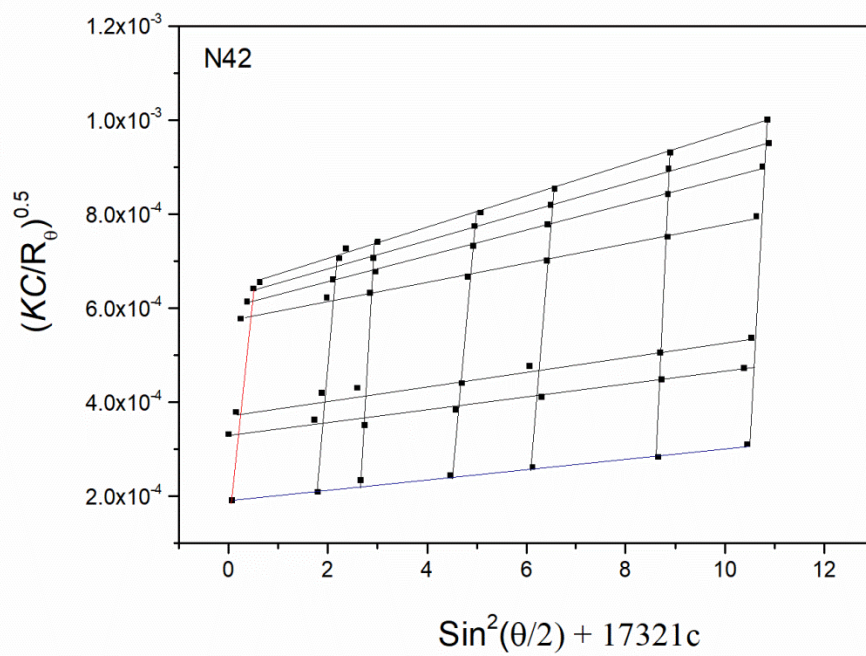

**Figure S3.** Berry plot by SLS analysis of nanogel N42.

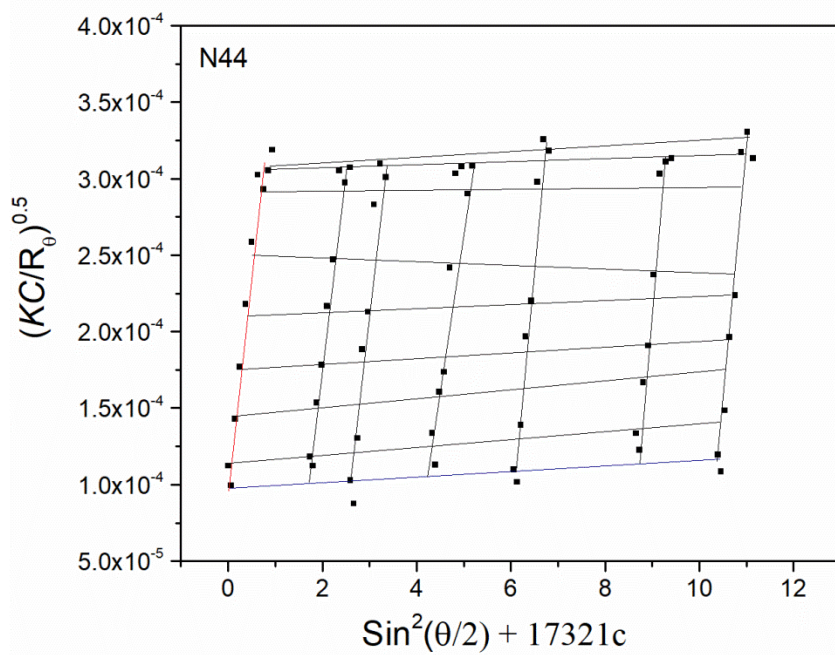

**Figure S4.** Berry plot by SLS analysis of nanogel N44.

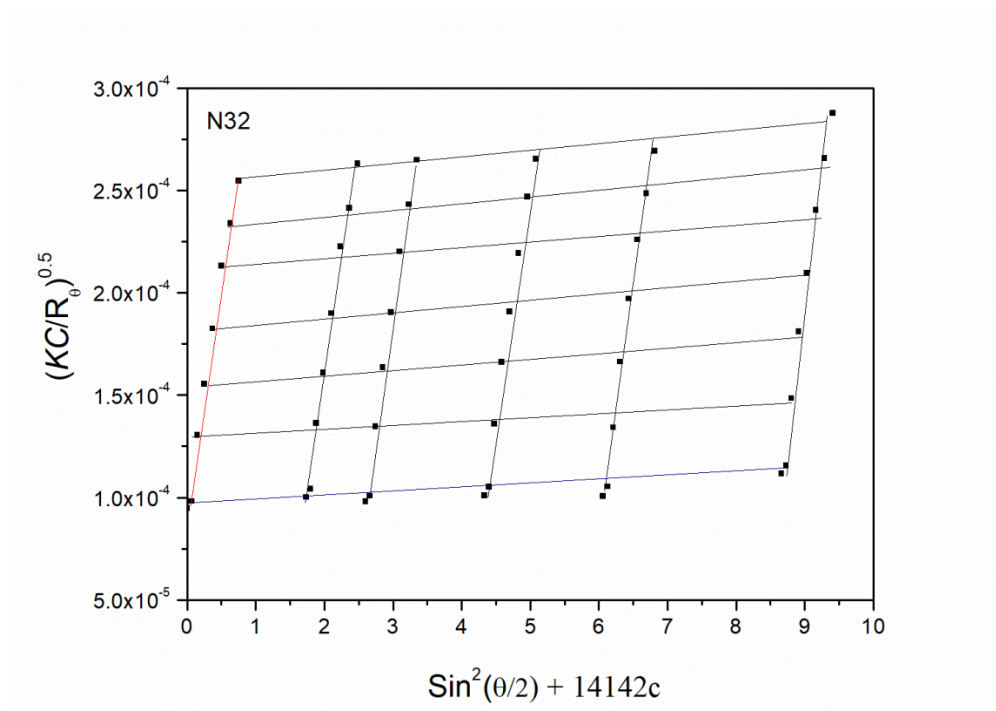

**Figure S5.** Berry plot by SLS analysis of nanogel N32.

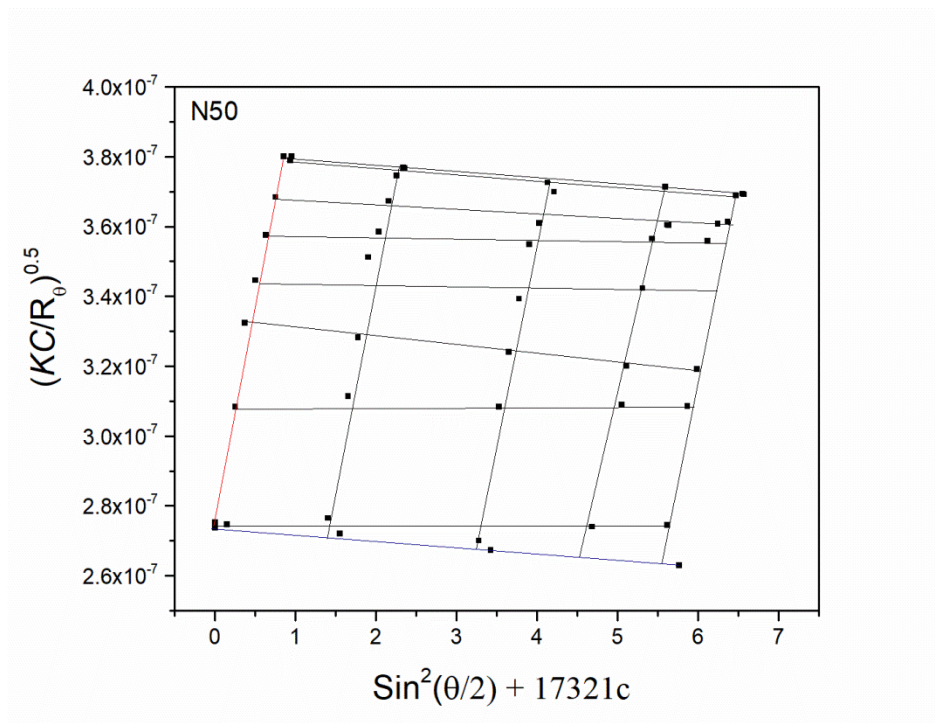

**Figure S6.** Berry plot by SLS analysis of nanogel N50.

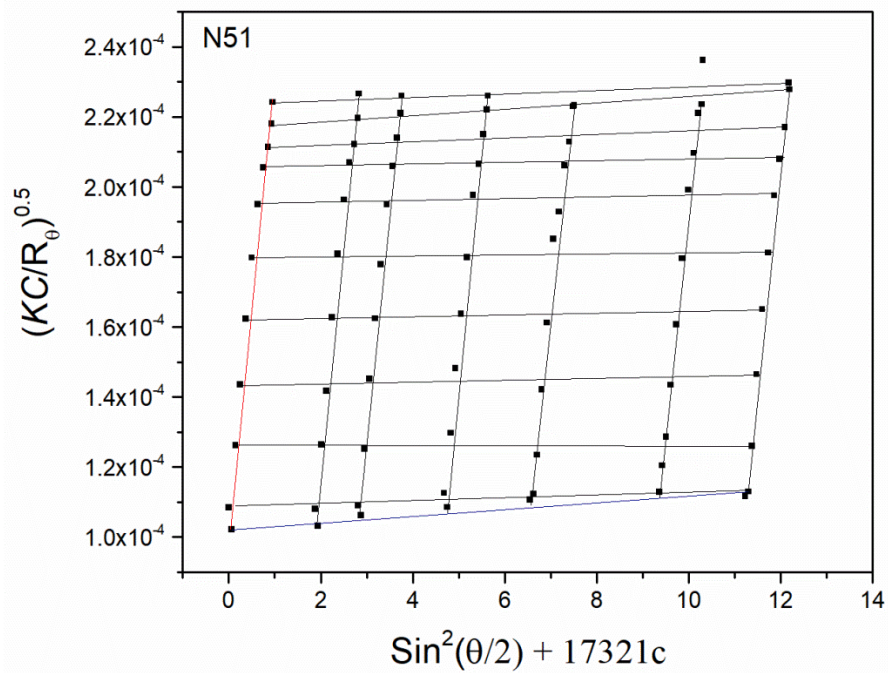

**Figure S7.** Berry plot by SLS analysis of nanogel N51.

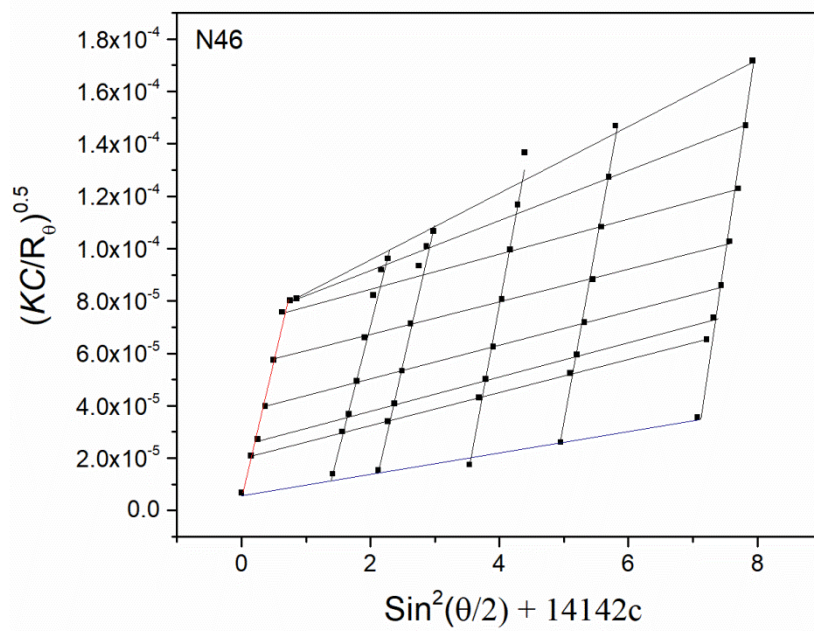

**Figure S8.** Berry plot by SLS analysis of nanogel N46.

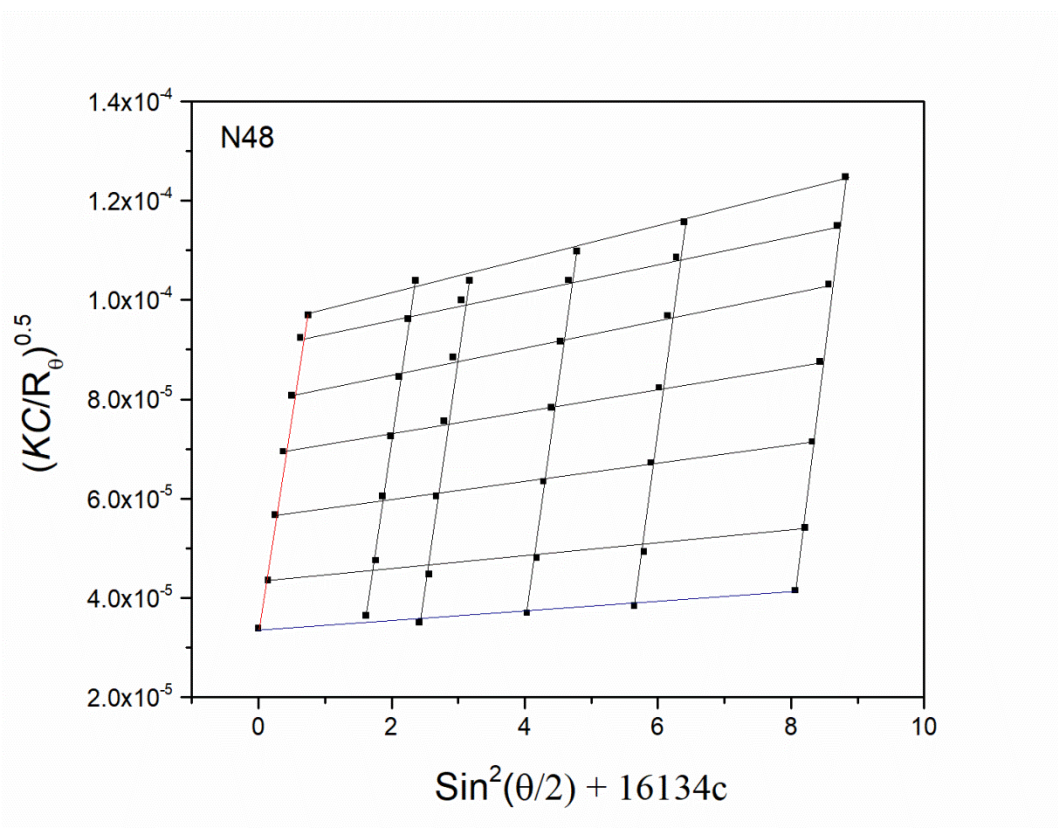

**Figure S9.** Berry plot by SLS analysis of nanogel N48.

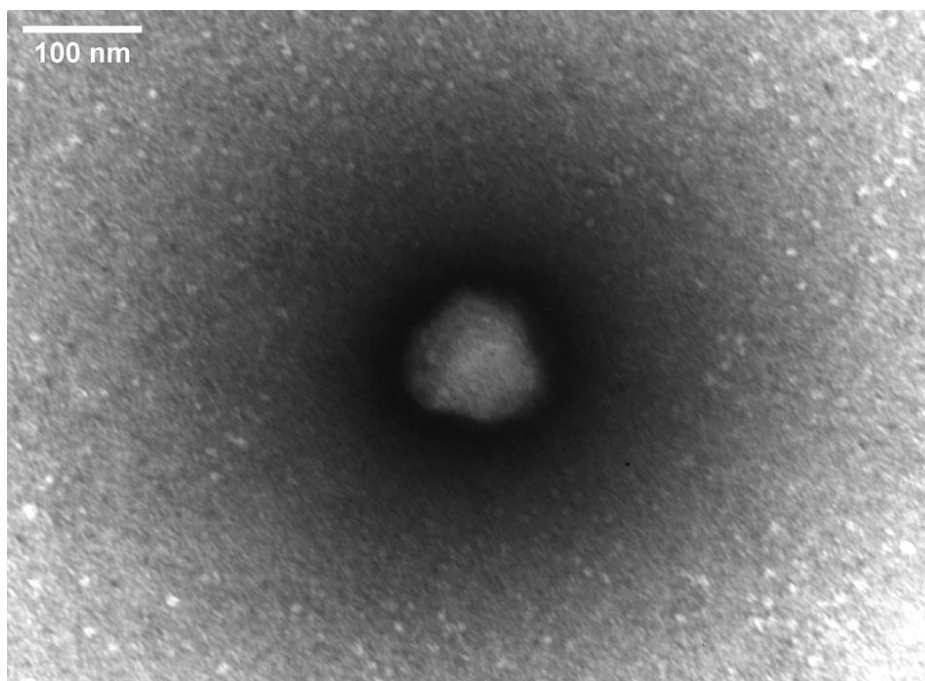

**Figure S10** TEM micrograph of nanogel N42 taken at 80 KeV.

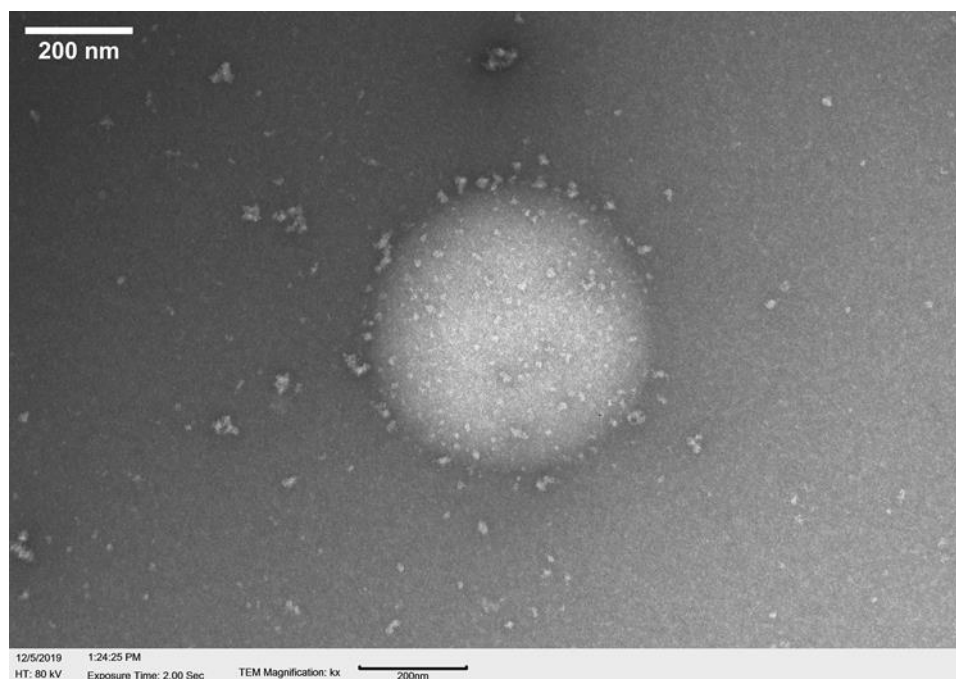

**Figure S11:** TEM-micrograph of nanogels N32 taken at 80 KeV.

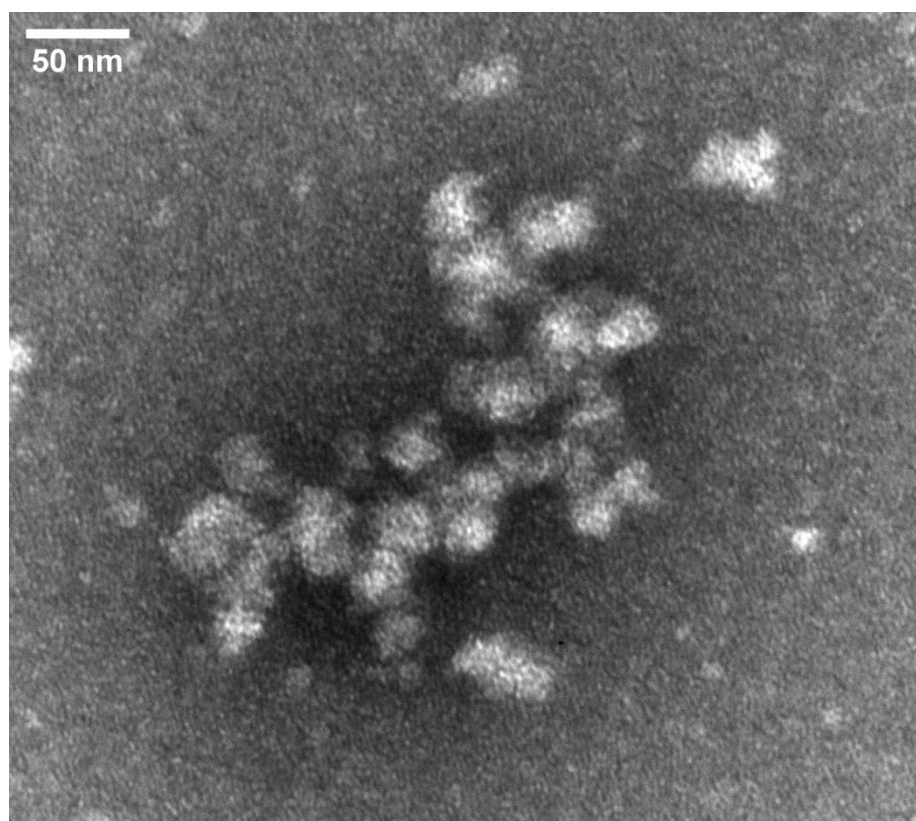

**Figure S12:** TEM micrograph of nanogels N50 taken at 80 KeV.

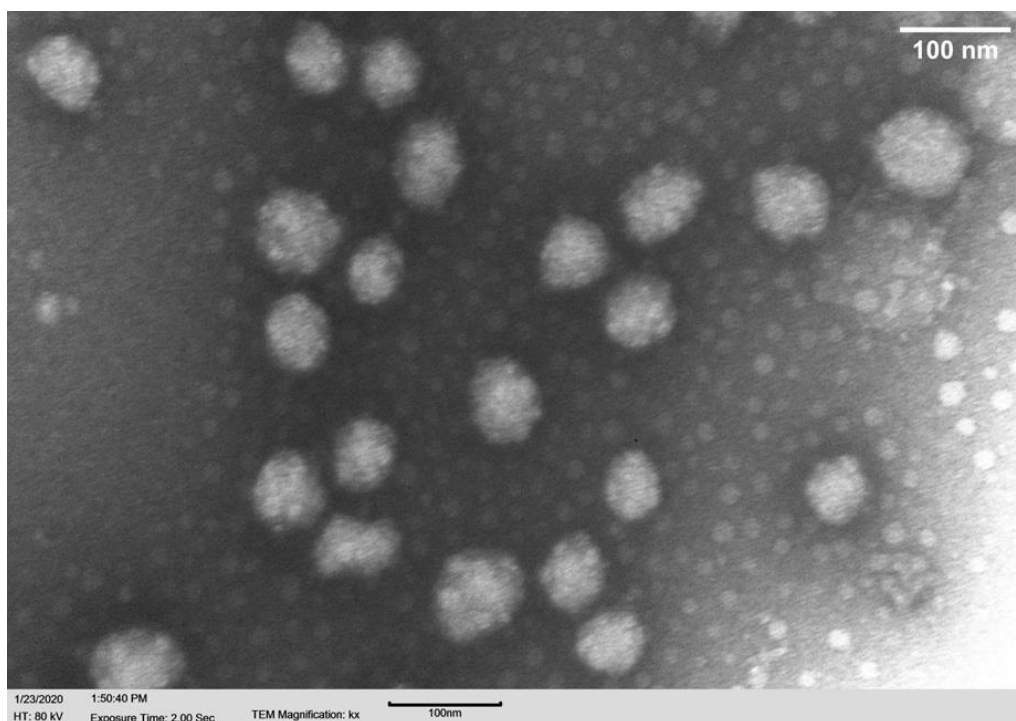

**Figure S13:** TEM-micrograph of nanogels N48 taken at 80 KeV.

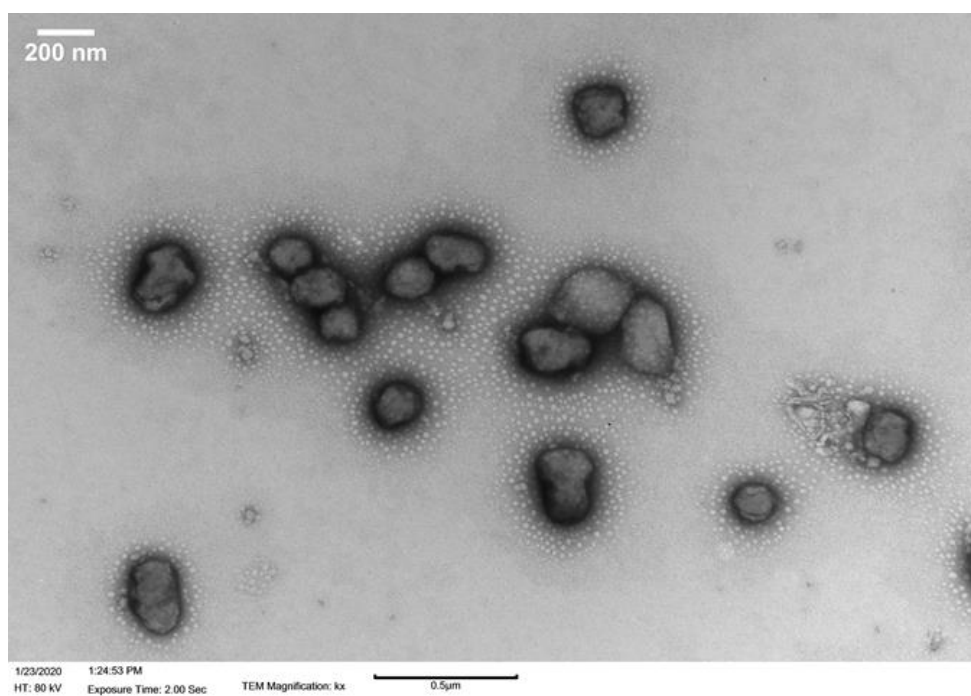

**Figure S14:** TEM micrograph of nanogels N45 taken at 80 KeV.

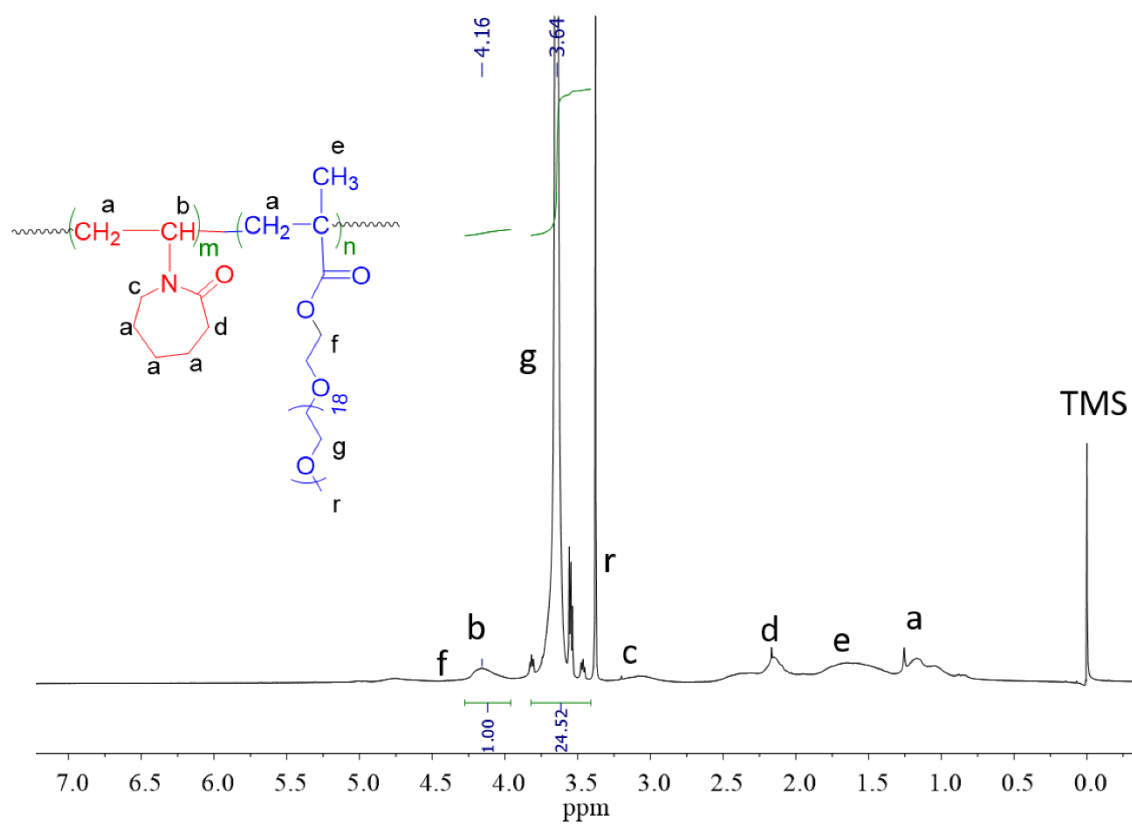

**Figure S15.**  $^1\text{H}$ -NMR spectrum of nanogel N32.

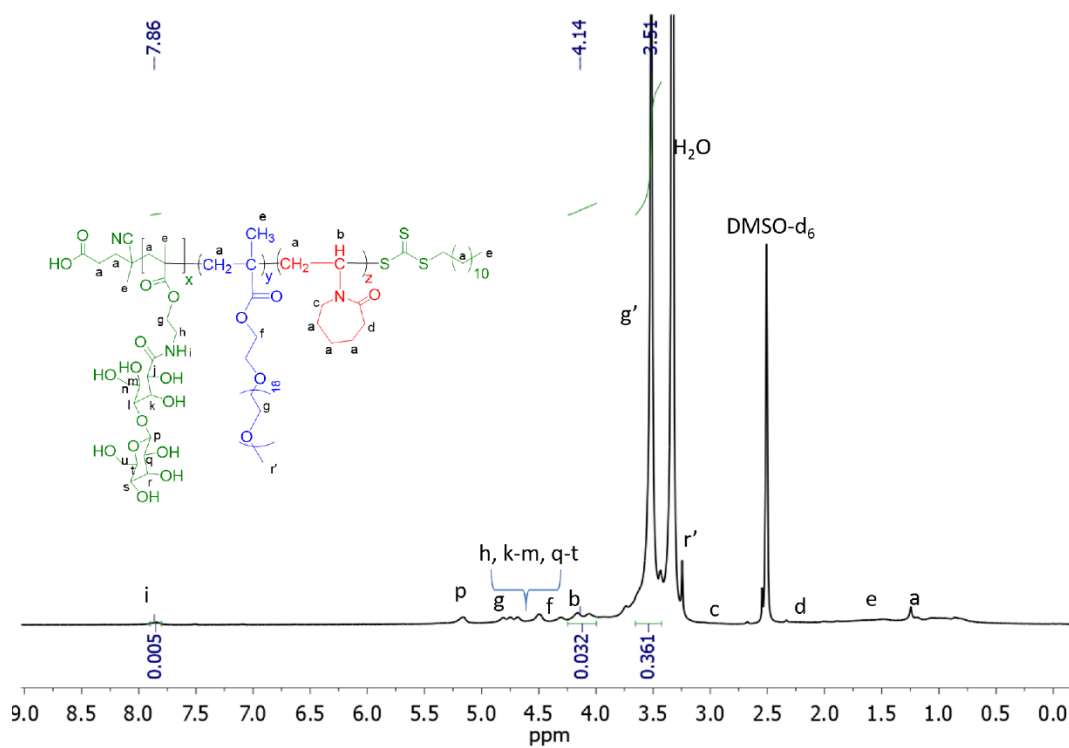

**Figure S16.**  $^1\text{H}$ -NMR spectrum of nanogel N44.

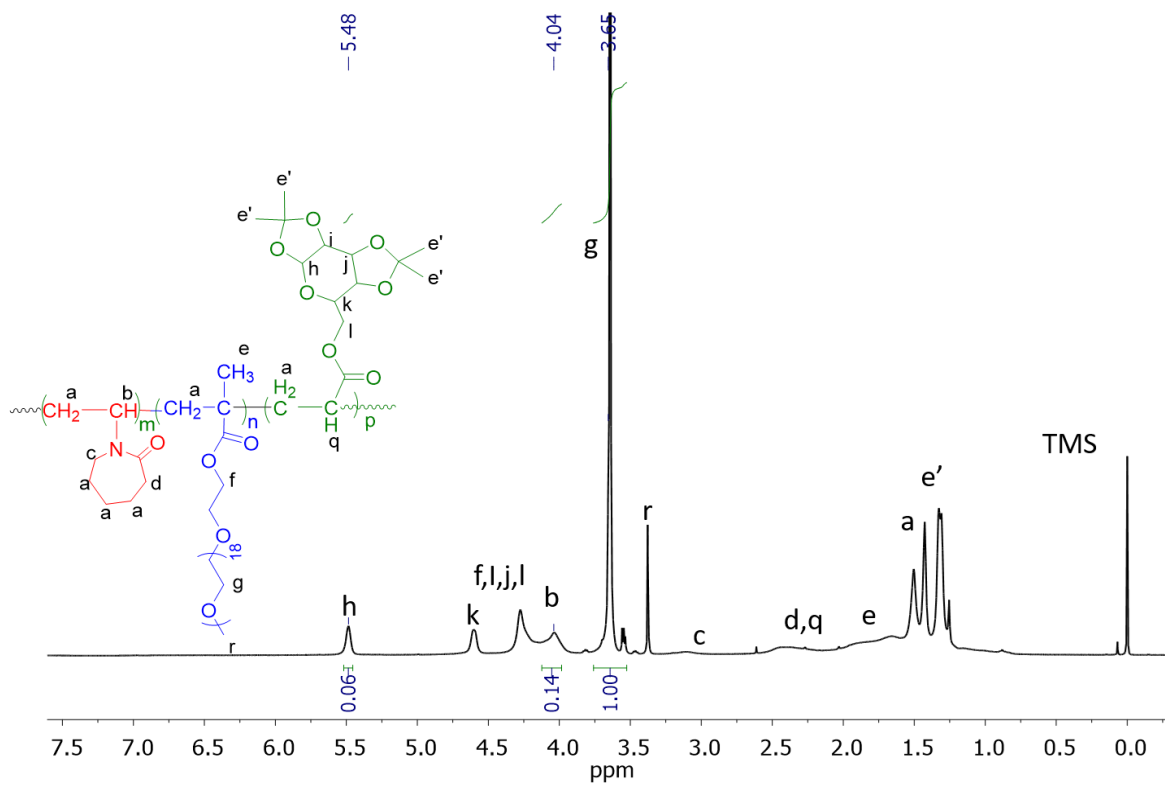

**Figure S17.** <sup>1</sup>H-NMR spectrum of nanogel N46.

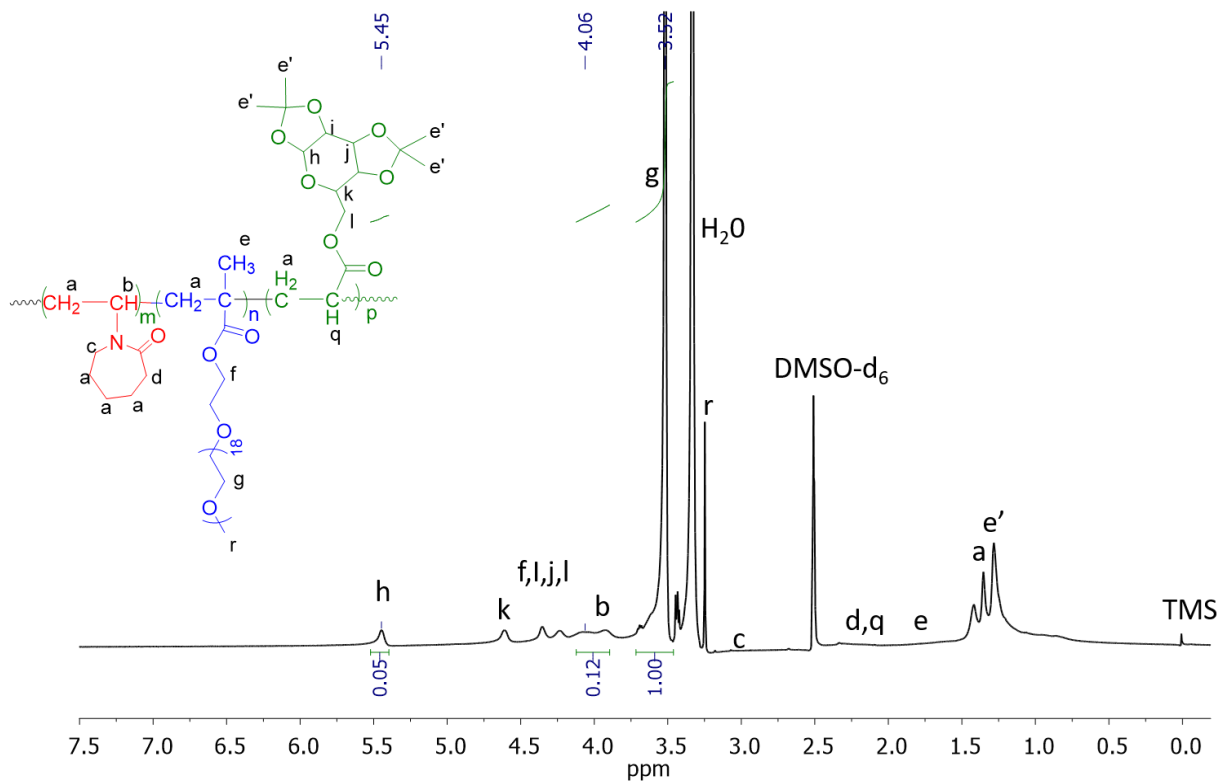

**Figure S18.** <sup>1</sup>H-NMR spectrum of nanogel N45.

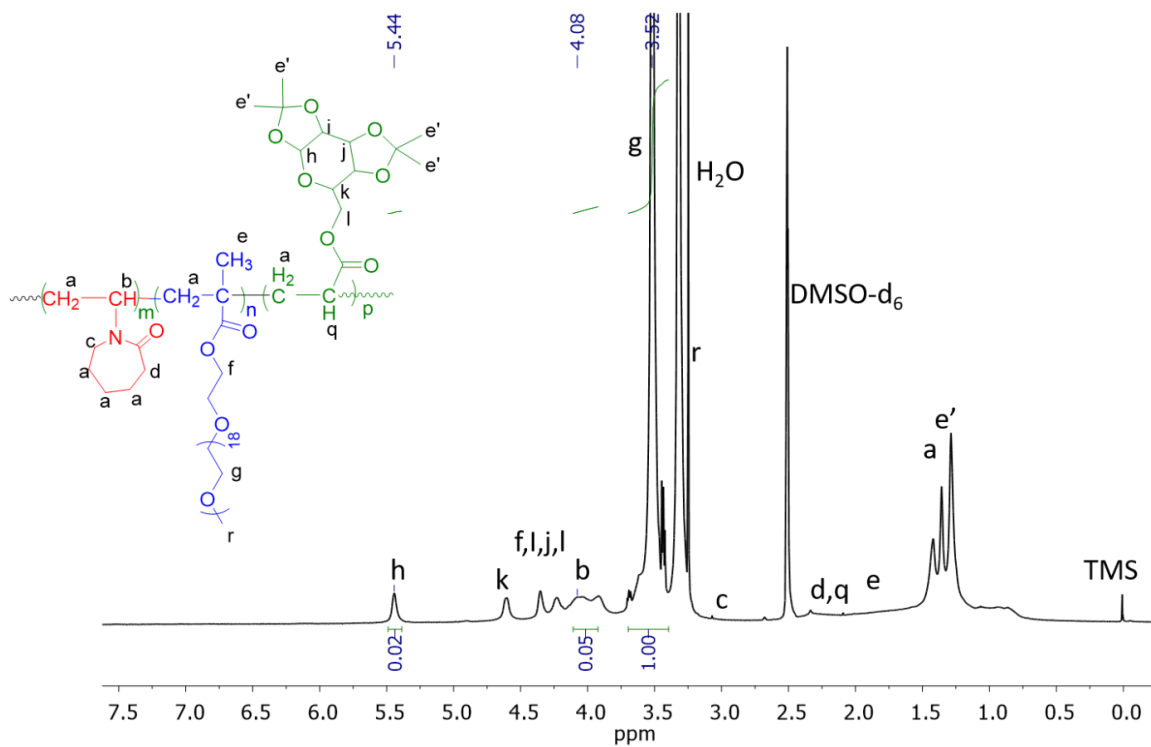

Figure S19.  $^1\text{H}$ -NMR spectrum of nanogel N48.

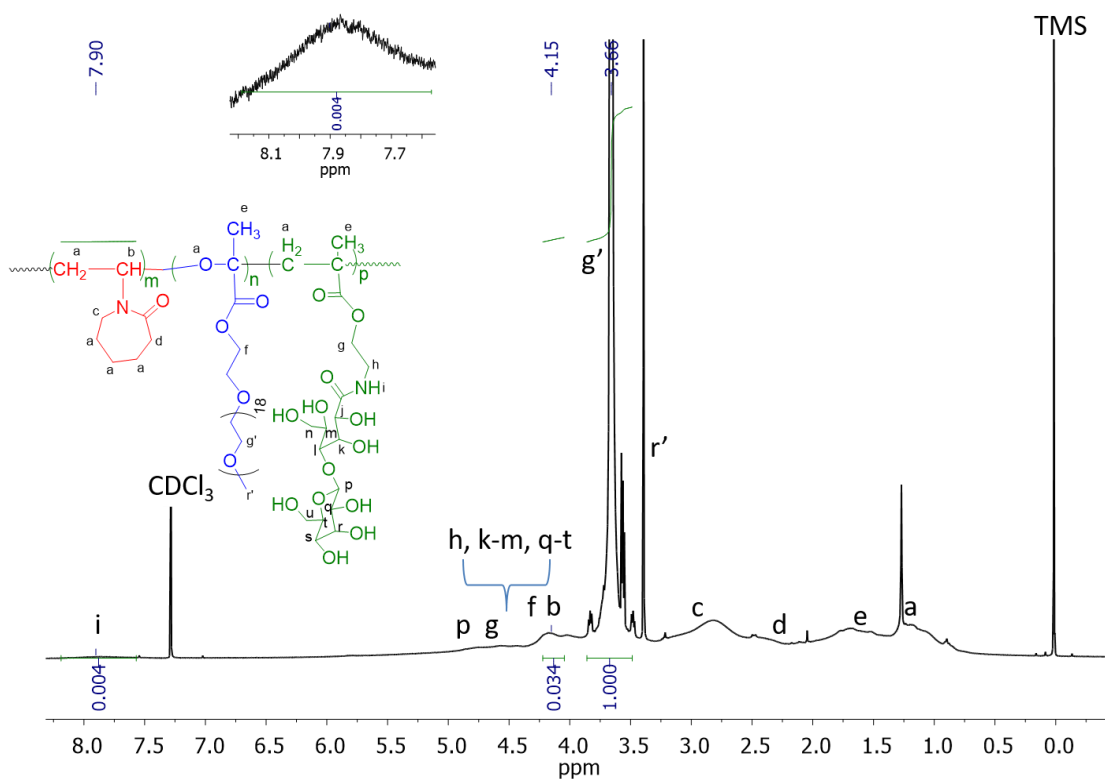

Figure S20.  $^1\text{H}$ -NMR spectrum of nanogel N50.

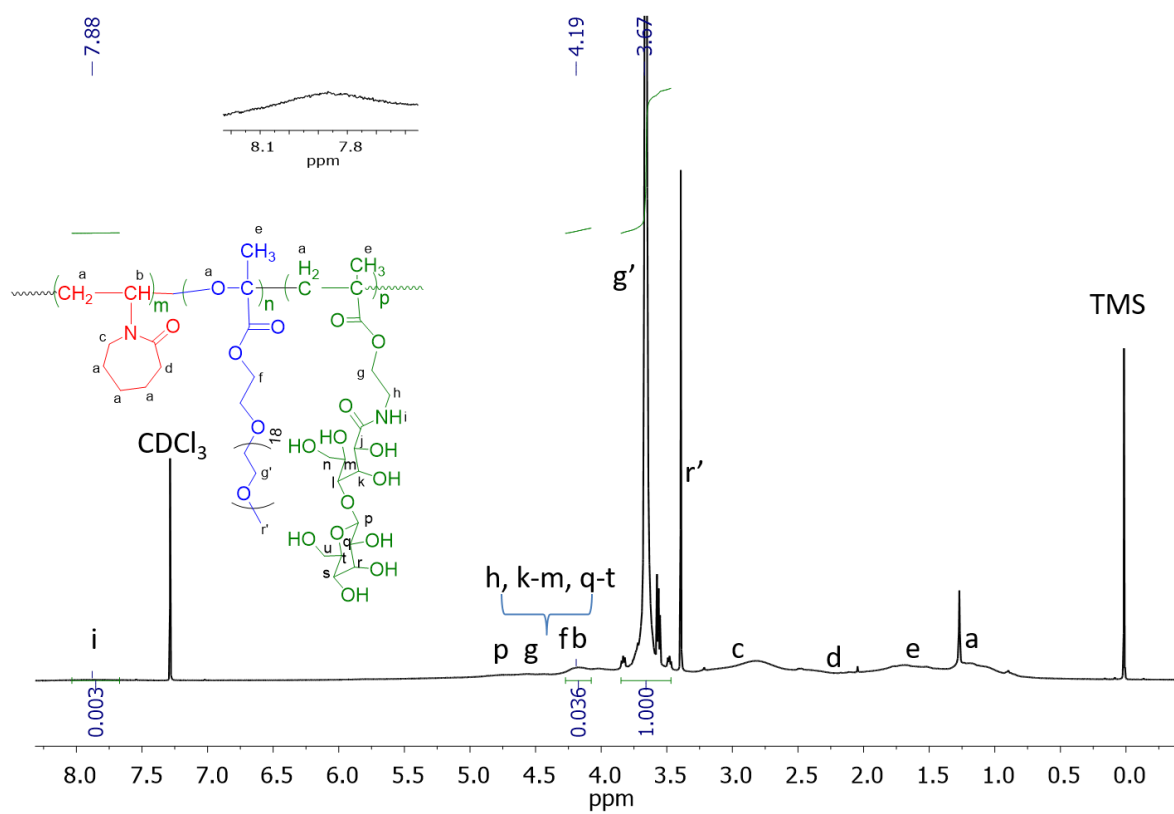

**Figure S21.**  $^1\text{H}$ -NMR spectrum of nanogel N51.

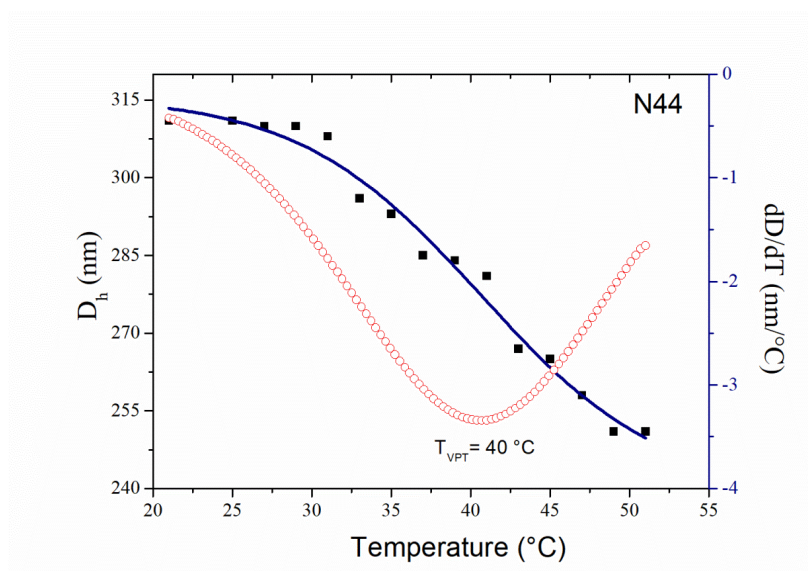

**Figure S22.**  $D_h$  of nanogel N44 as function of temperature obtained by DLS.

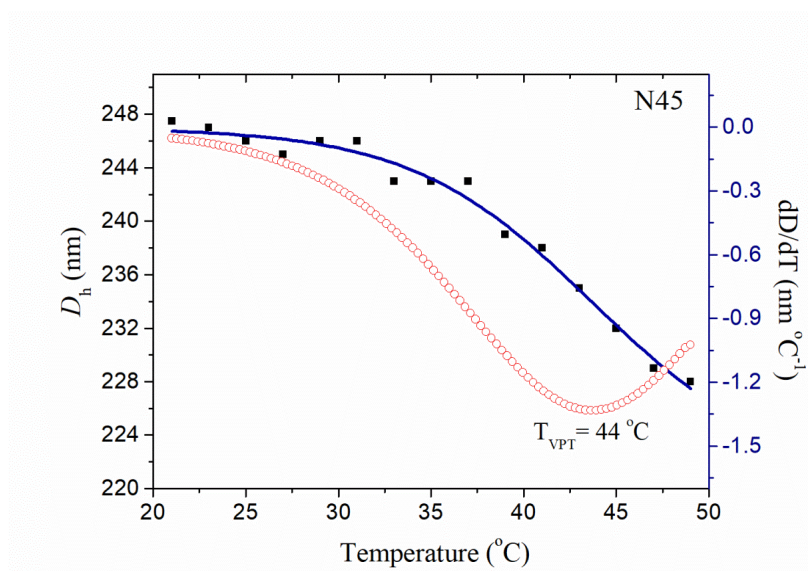

**Figure S23.**  $D_h$  of nanogel N45 as function of temperature obtained by DLS.

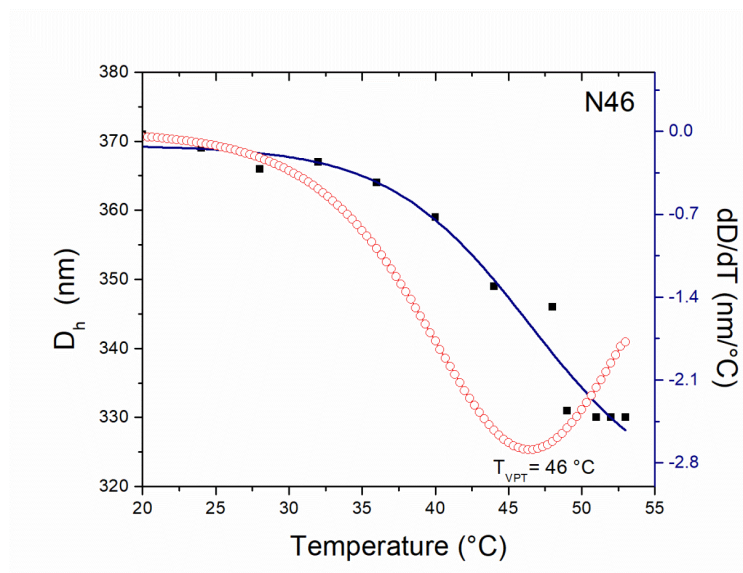

**Figure S24.**  $D_h$  of nanogel N46 as function of temperature obtained by DLS.

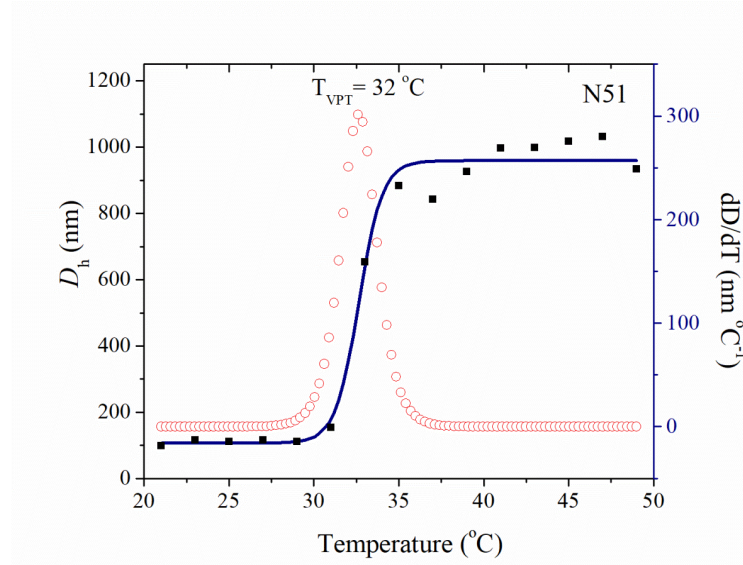

**Figure S25.**  $D_h$  of nanogel N51 as function of temperature obtained by DLS.
